# Supplementary material
Source: PubMed Central journal article supplement (PMC3674836)
Supplement: NIHMS371251-supplement-Suppl_Data.pdf [file NIHMS371251-supplement-Suppl_Data.pdf]

## Supplemental information

### ***KIF7 (Costal2)* mutations cause fetal Hydrolethalus and Acrocallosal syndromes**

Audrey Putoux<sup>1,2,\*</sup>, Sophie Thomas<sup>1,2,\*</sup>, Karlien Coene<sup>3</sup>, Erica E Davis<sup>4</sup>, Yasemin Alanay<sup>5</sup>, Gönül Ogur<sup>6</sup>, Elif Uz<sup>7</sup>, Daniela Buzas<sup>8</sup>, Céline Gomes<sup>1</sup>, Sophie Patrier<sup>9</sup>, Christopher L Bennett<sup>6</sup>, Nadia Elkhartoufi<sup>10</sup>, Marie-Hélène Saint Frison<sup>11</sup>, Luc Rigonnot<sup>8</sup>, Nicole Joyé<sup>9,12</sup>, Solenn Pruvost<sup>13</sup>, Gulen Eda Utine<sup>5</sup>, Koray Boduroglu<sup>5</sup>, Patrick Nitschke<sup>14</sup>, Laura Fertitta<sup>1</sup>, Christel Thauvin<sup>15</sup>, Arnold Munnich<sup>1,2,10</sup>, Valérie-Cormier-Daire<sup>1,2,10</sup>, Raoul Hennekam<sup>16</sup>, Estelle Colin<sup>17</sup>, Nurten A Akarsu<sup>7</sup>, Christine Bole-Feysot<sup>13</sup>, Nicolas Cagnard<sup>14</sup>, Alain Schmitt<sup>18</sup>, Nicolas Goudin<sup>19</sup>, Stanislas Lyonnet<sup>1,2,10</sup>, Féréchté Encha-Razavi<sup>1,2,10</sup>, Jean-Pierre Siffroi<sup>9,12</sup>, Mark Winey<sup>20</sup>, Nicholas Katsanis<sup>4</sup>, Marie Gonzales<sup>9,12</sup>, Michel Vekemans<sup>1,2,10</sup>, Philip L. Beales<sup>21</sup>, Tania Attié-Bitach<sup>1,2,10</sup>

1- INSERM U-781, Hôpital Necker-Enfants Malades, Paris, France

2- Université René Descartes, Paris 5, France

3- Radboud University Nijmegen Medical Centre, Department of Human Genetics (855), Geert Grooteplein Zuid 10, 6525 GA Nijmegen, The Netherlands

4- Departments of Cell Biology and Pediatrics, Center for Human Disease Modeling, Duke University, Durham, NC 27710, USA

5- Pediatric Genetics Unit, Department of Pediatrics, Hacettepe University Medical Faculty, Ankara, Turkey

6- Ondokuz Mayıs University, Department of Medical/Pediatric Genetics, Samsun, Turkey

7- Gene Mapping Laboratory, Department of Medical Genetics, Hacettepe University Medical Faculty, Ankara, Turkey

8- Service de Gynécologie-Obstétrique, CH Sud Francilien, Evry, France

9- Service de Génétique et d'Embryologie Médicales, Hôpital Armand Trousseau, Paris, France

10- Département de Génétique, Hôpital Necker-Enfants Malades, AP-HP, Paris, France

11- Service d'Anatomie Pathologique, CH Victor Dupouy, Argenteuil, France

12- Université Pierre et Marie Curie, Paris 6, France

13- Genomic Core Facility, Imagine Fondation, Hôpital Necker-Enfants Malades, Paris France

14- Service de Bioinformatique, Université Paris – Descartes, Paris, France

15- Service de Génétique, CHU de Dijon, Dijon, France

16- Department of Pediatrics, Academic Medical Center, University of Amsterdam, Meibergdreef 9, 1105 AZ Amsterdam, The Netherlands

17- Service de Génétique, Hôpital d'Angers, France

18- CNRS UMR 8104, Institut Cochin, Université Paris Descartes, Paris, France

19- IFR 94, Faculté de Médecine Necker, Paris, France

20- MCDB, UCB 347, University of Colorado at Boulder, Boulder CO 80309-0347, USA

21- Molecular Medicine Unit, University College London (UCL) Institute of Child Health, London WC1N 1EH, UK

\* Equally contributed

#### **Corresponding author:**

Tania ATTIE-BITACH

Département de Génétique et Unité INSERM U-781

Hôpital Necker-Enfants Malades, Paris, France

Tel: 33 (0) 1 44 49 51 44

Fax: 33 (0) 1 44 49 51 50

Email: [tania.attie@inserm.fr](mailto:tania.attie@inserm.fr)

**Supplementary figure 1: Results of linkage analysis in family 1**

(a) Results of the multipoint linkage analysis with Affymetrix 250K SNP chips using MERLIN software assuming a fully penetrant recessive model with a disease allele of frequency 0.0001 and allowing for heterogeneity between families. The highest heterogeneity lodscore (Hlod 2,6) is found on chromosome 15. (b) Pedigree of family 1 and haplotype analysis confirming homozygosity on chromosome 15 between D15S114 and D15S127.

**a**

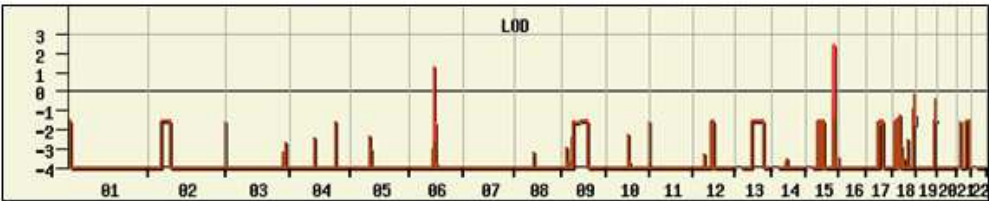

**b**

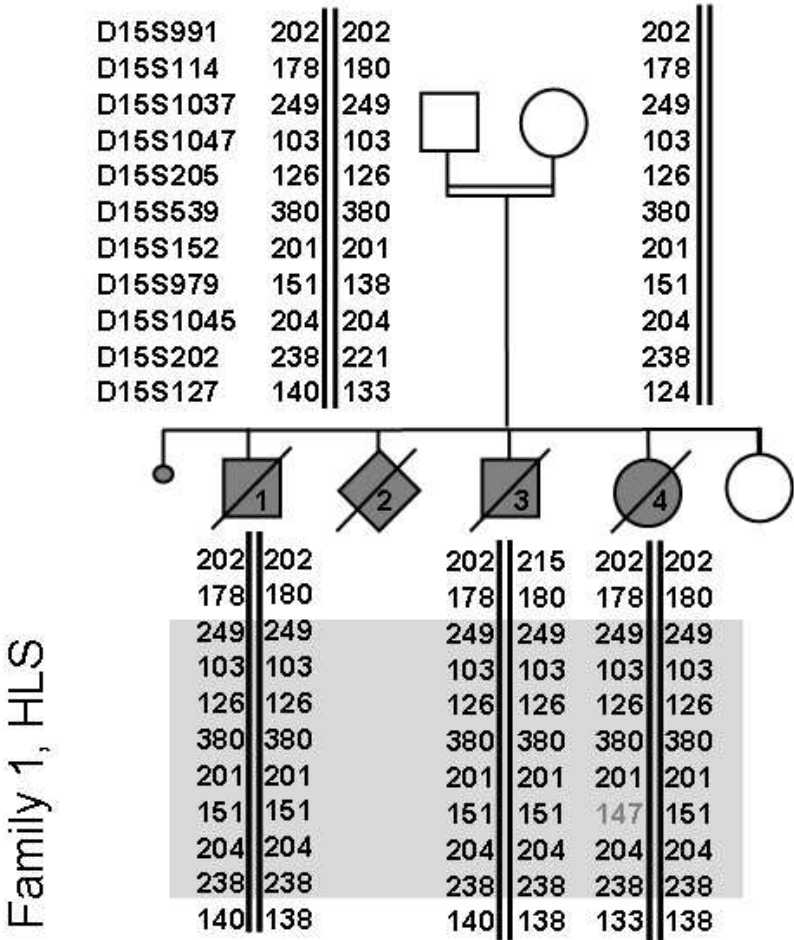

Family 1, HLS

## Supplementary figure 2: *KIF7* mutations result in impaired cilia length

(a-c) Confocal microscopy of two different *KIF7*-mutated fibroblast lines from affected individuals ACLS-T1 and ACLS-N1 marked by acetylated alpha tubulin (axoneme) and pericentrin (basal body). While cilia were apparently normal in human fibroblasts from control (a) and *KIF7* mutated patient ACLS-T1 (c), they seemed markedly longer in ACLS-N1 (b). Measurement of cilia length (d): Analysis of variance (Anova) showed a significant difference on cilium length between control and patient ACLS-N1 fibroblasts. Ultrastructural analysis of primary cilia from *KIF7* mutated ACLS-T1 shows apparently normal structural components: (e) Longitudinal section of a primary cilium growing into a ciliary pocket. The inset is a higher magnification of the primary cilium basal body. (f) Longitudinal section of a primary cilium through the basal body showing the 9 microtubular triplets normally organized. (g) Longitudinal section through the transition zone of a primary cilium showing normal anchoring at the plasma membrane.

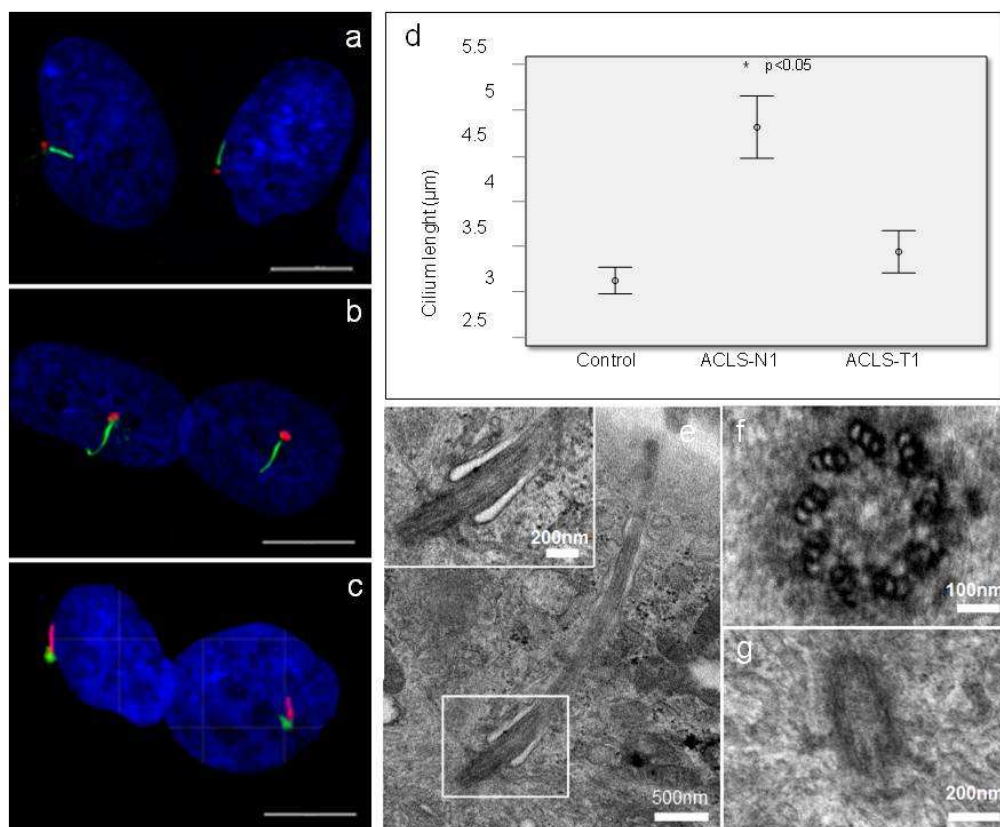

**Supplementary Table 1** : Syndromes including cerebral anomalies and polydactyly.

OFD: orofaciodigital syndrome; HPE: holoprosencephaly; HPS: Holoprosencephaly-Polydactyly syndrome (pseudotrisonomy 13); PHS: Pallister-Hall syndrome, DWM: Dandy-Walker Malformation, OE: occipital encephalocele; MTS: molar tooth sign; MR: mental retardation

| Syndromes            | OMIM   | Vermis          | Corpus Callosum      | Other brain anomalies          | Upper limb Polydactyly | Lower limb Polydactyly | Cleft | Other                                                                                                | Molecular defect    |
|----------------------|--------|-----------------|----------------------|--------------------------------|------------------------|------------------------|-------|------------------------------------------------------------------------------------------------------|---------------------|
| <b>Greig</b>         | 175700 | -               | agenesis             | -                              | Post-axial             | Preaxial               | -     | Macrocephaly, Hypertelorism, Syndactyly                                                              | <i>GLI3</i>         |
| <b>PHS</b>           | 146510 | -               | normal               | hypothalamic hamartoblastoma   | Post axial or central  | Post axial or central  | -     | Facial dysmorphism, bifid uvula, syndactyly, cardiac malformation, renal anomalies, imperforate anus | <i>GLI3</i>         |
| <b>Acrocallosal</b>  | 200990 | Agenesis<br>DWM | agenesis             | Arachnoid cysts<br>Anencephaly | Post-axial             | Preaxial               | -     | Macrocephaly, Hypertelorism                                                                          | ?                   |
| <b>HPS</b>           | 264480 | -               | possible<br>agenesis | HPE<br>Hydrocephaly            | Post-axial             | Preaxial               | +     | Micrognathia, Genital anomalies in male                                                              | ?                   |
| <b>Hydrolethalus</b> | 236680 | -               | possible<br>agenesis | Hydrocephaly<br>Anencephaly    | Post-axial             | Preaxial               | +     | Cardiac anomalies<br>Key hole foramen magnum<br>Micrognathia, Polyhydramnios                         | <i>HYLS1</i>        |
| <b>Joubert</b>       | 213300 | MTS             | normal               | OE<br>Polymicrogyria           | Post-axial             | Post-axial             | -     | MR, Cerebellar ataxia<br>Abnormal eyes movements<br>Retinal dystrophy, Renal anomalies               | <i>JBS1-JBS10</i>   |
| <b>Meckel</b>        | 249000 | agenesis<br>MTS | normal               | OE<br>Anencephaly              | Post-axial             | Post-axial             | +/-   | Cystic kidneys, Biliary dysgenesis<br>Skeletal anomalies                                             | <i>MKS1-MKS6</i>    |
| <b>OFD VI</b>        | 277170 | agenesis<br>MTS | agenesis             | Wide ventricles                | Central                | Preaxial               | +     | Lingual and dental anomalies<br>Genital anomalies                                                    | <i>TMEM216/MKS2</i> |

**Supplementary Table 2: KIF7 Primers used for sequencing and RT-PCR.**

PCR primers were selected with primer3 program (<http://frodo.wi.mit.edu/primer3/input.htm>) according to reference sequence NM\_198525. PCR products were purified with the Exo-SAP cleanup kit (USB) and sequenced with BigDye chemistry and ABI 3100 (Applied Biosystems) automated sequencer. Sequences were analyzed with SeqScape® software.

| <b>Primers</b> | <b>Sequence</b>         | <b>PCR size</b> |
|----------------|-------------------------|-----------------|
| KIF7-2F        | AGGAGCTGCAGGATCTGG      | 591             |
| KIF7-2R        | CACAGATCCCTGTCTAGGAAATC |                 |
| KIF7-3F        | CACTGCCTTCTCCATCCTAGAG  | 458             |
| KIF7-3R        | GCTAAAGCAAAACCTCCCAG    |                 |
| KIF7-4F        | GGTCAGGAAGGGCAGGTT      | 717             |
| KIF7-4R        | CCCAGCGAGTCTTTGAGGAT    |                 |
| KIF7-5F        | AGGTCCCCTGAGGTCTCC      | 826             |
| KIF7-5R        | AGCTGGAGACCTGAGACTCG    |                 |
| KIF7-6F        | CACCAGTGGGTCTGGAGTTC    | 376             |
| KIF7-6R        | GACTCTACACCCCTACCCCG    |                 |
| KIF7-7F        | TTTGACACTCCTCATTTTCAGC  | 494             |
| KIF7-7R        | ACAGCTGAAAGCAGCCTCTC    |                 |
| KIF7-8F        | CAGAGGGGTCAATTTGAGCTG   | 386             |
| KIF7-8R        | CATCCTAGGACCCAGAGGC     |                 |
| KIF7-9F        | TCTGCCAGACTCACATCCTG    | 721             |
| KIF7-10R       | AGGCTGGGCTGAGTATCAAA    |                 |
| KIF7-11F       | CAAAGGCTTGGTCAAACCC     | 472             |
| KIF7-11R       | CTATACCAGCCTCACCCCTGC   |                 |
| KIF7-12F       | CCGGCCTCTGTTATTATTATTGG | 467             |
| KIF7-12R       | CAGGCTAAGTGACCTGCTTTC   |                 |
| KIF7-13F       | AGATTTGTGTGGGATGGGTC    | 742             |
| KIF7-14R       | TGGCAGGTTTATCACTTGGA    |                 |
| KIF7-15F       | GCTGAGCAGAACATTTGGAG    | 474             |
| KIF7-15R       | AGTGAAAACCTGGGTCTGCC    |                 |
| KIF7-16F       | GCTGACTTGGCCCTTGG       | 473             |
| KIF7-16R       | CTGCAGATGAGTTGGTCCTG    |                 |
| KIF7-17F       | GGGAAGACCCTGGTGATTC     | 358             |
| KIF7-17R       | GCCGGGGTTGTGAGCCAT      |                 |
| KIF7-18F       | ACAGCCCCTGCACCTACA      | 398             |
| KIF7-18R       | AAGCAACCTGTGAATTGAGC    |                 |
| KIF7-19F1      | TGGGGAAAGCTTAGAGACCA    | 445             |
| KIF7-19R1      | ACAAAGGCCCAAAGTTCCAG    |                 |
| KIF7-19F2      | GACAGGCTCCTGGAAATGAA    | 473             |
| KIF7-19R2      | TTGATCCCAGTGAGGGTACAG   |                 |
| <b>RT-PCR</b>  |                         |                 |
| KIF7-RT-14F    | AGAAGACGGGGCTGGAGA      | 290             |
| KIF7-RT-16R    | GGCCTCATCCAACCTGGAAC    |                 |
| KIF7-RT-1F     | CTGGGGATGGAAACCTGACT    | 614             |
| KIF7-RT-4R     | CTCCACGTGACCTCCTTC      |                 |

**Supplementary Table 3: Heterozygous missense variations found in the *KIF7* gene**

| <i>KIF7</i> missense variations | Phenotype         | Other mutated alleles                                                         | db SNP | 1000 genomes | Controls | PolyPhen-2                       | SIFT          | Human Splicing Finder        |
|---------------------------------|-------------------|-------------------------------------------------------------------------------|--------|--------------|----------|----------------------------------|---------------|------------------------------|
| c.3345C>G, p.H1115Q             | MKS<br>HLS        | -                                                                             | -      | -            | 0/384    | Probably damaging<br>PSIC: 0.995 | Not tolerated |                              |
| c.2501A>G, p.Q834R              | OFDVI<br>BBS (x2) | <i>BBS10</i> : p.C91fsX95 heterozygous,<br><i>BBS7</i> : p.Q293P heterozygous | -      | -            | 3/384    | Possibly damaging<br>PSCI: 0.550 | Not tolerated |                              |
| c.1895C>T, p.P632L              | PHS               | -                                                                             | -      | -            | 0/384    | Benign<br>PSCI: 0.001            | Not tolerated |                              |
| c.2105G>A, p.R702Q              | ACLS              | -                                                                             | -      | -            | 0/384    | Probably damaging<br>PSCI: 0.900 | Tolerated     | Possible splice modification |
| c.1921A>G, p.R641G              | BBS               | <i>BBS1</i> : p.M390R homozygous                                              | -      | -            | 0/384    | Benign<br>PSCI: 0.112            | Not tolerated | Possible splice modification |
| c.2276T>C, p.L759P              | BBS               | -                                                                             | -      | -            | 0/384    | Possibly damaging<br>PSCI: 0.693 | Not tolerated |                              |
| c.2981A>G, p.Q994R              | BBS               | <i>BBS1</i> :<br>[p.M390R]+[p.R419X]                                          | -      | -            | 0/384    | Possibly damaging<br>PSCI: 0.813 | Tolerated     |                              |
| c.3202C>T, p.R1068W             | BBS               | <i>BBS9</i> :<br>[p.K621fsX22]+[p.A665fsX13]                                  | -      | -            | 0/384    | Probably damaging<br>PSCI: 0.997 | Not tolerated |                              |

MKS: Meckel, HLS: Hydrolethalus, OFDVI: orofacioidigital type VI, BBS: Bardet-Biedl, PHS: Pallister-Hall, ACLS: acrocallosal syndrome

**Supplementary Table 4: Zebrafish somite angle morphometrics for *kif7* mutant rescue assays**

| Injection        | Somite angle Measurements |          |        | p-values   |               |         | Pathogenicity |
|------------------|---------------------------|----------|--------|------------|---------------|---------|---------------|
|                  | n=                        | Mean (°) | S.E.M. | vs. WT RNA | vs. WT rescue | vs. MO  |               |
| Controls         | 59                        | 84.1     | 0.5    |            |               |         |               |
| MO               | 58                        | 99.1     | 1.0    |            |               |         |               |
| WT RNA           | 57                        | 87.8     | 1.0    |            |               |         |               |
| MO + WT RNA      | 43                        | 88.2     | 1.2    |            |               |         |               |
| P632L RNA        | 62                        | 86.7     | 0.7    | 0.3758     |               | <0.0001 | Hypomorph     |
| MO + P632L       | 63                        | 94.1     | 0.8    |            | 0.0001        | 0.0001  |               |
| R641G RNA        | 63                        | 85.9     | 0.7    | 0.1255     |               | <0.0001 | Hypomorph     |
| MO + R641G       | 61                        | 92.9     | 0.7    |            | 0.0005        | <0.0001 |               |
| R702Q RNA        | 60                        | 86.6     | 0.6    | 0.3045     |               | <0.0001 | Hypomorph     |
| MO + R702Q RNA   | 65                        | 93.8     | 0.8    |            | 0.0001        | <0.0001 |               |
| L759P RNA        | 58                        | 85.1     | 0.7    | 0.0273     |               | <0.0001 | Hypomorph     |
| MO + L759P RNA   | 56                        | 96.0     | 0.8    |            | <0.0001       | 0.0174  |               |
| Q834R RNA        | 52                        | 86.1     | 0.8    | 0.2027     |               | <0.0001 | Hypomorph     |
| MO + Q834R RNA   | 59                        | 94.3     | 1.1    |            | 0.0005        | 0.0015  |               |
| Q994R RNA        | 60                        | 87.0     | 0.8    | 0.5301     |               | <0.0001 | Hypomorph     |
| MO + Q994R       | 59                        | 95.0     | 0.9    |            | <0.0001       | 0.0029  |               |
| R1068W RNA       | 71                        | 86.6     | 0.6    | 0.2870     |               | <0.0001 | Hypomorph     |
| MO + R1068W RNA  | 60                        | 94.8     | 1.4    |            | 0.0008        | 0.0115  |               |
| H1115Q RNA       | 58                        | 88.0     | 0.8    | 0.8496     |               | <0.0001 | Hypomorph     |
| MO + H1115Q RNA  | 55                        | 95.0     | 1.1    |            | 0.0001        | 0.0056  |               |
| R1325Q* RNA      | 52                        | 84.9     | 0.8    | 0.0279     |               | <0.0001 | Benign        |
| MO + R1325Q* RNA | 49                        | 87.1     | 0.9    |            | 0.4167        | <0.0001 |               |

\* rs73477443

### **Supplementary Table 5: List of genes deregulated in *KIF7* mutated fetuses**

List of genes deregulated (fold change >1.2;  $p < 0.05$ ) in *KIF7* mutated fetuses as compared to age-matched controls. Work sheets 1 to 5 contain the lists of genes presented in the heat map. Work sheets 6 and 7 contain all the genes down or up regulated respectively in *KIF7* mutated fetuses as compared to age-matched controls. Work sheet 8 contains the qPCR results with the TaqMan Assays of the selected GLI targets used.

See Excel file online.
